# Supplementary material for: Spatiotemporal localization of proteins in mycobacteria
Source: PubMed Central journal article supplement — Cell Rep. Author manuscript; Available in PMC 2022 Feb 22. (PMC8861988; doi:10.1016/j.celrep.2021.110154), 2021-12-28
Supplement: NIHMS1767651-supplement-1.pdf [file NIHMS1767651-supplement-1.pdf]

**Cell Reports, Volume 37**

**Supplemental information**

**Spatiotemporal localization  
of proteins in mycobacteria**

**Junhao Zhu, Ian D. Wolf, Charles L. Dulberger, Harim I. Won, Jemila C. Kester, Julius A. Judd, Samantha E. Wirth, Ryan R. Clark, Yawei Li, Yuan Luo, Todd A. Gray, Joseph T. Wade, Keith M. Derbyshire, Sarah M. Fortune, and Eric J. Rubin**

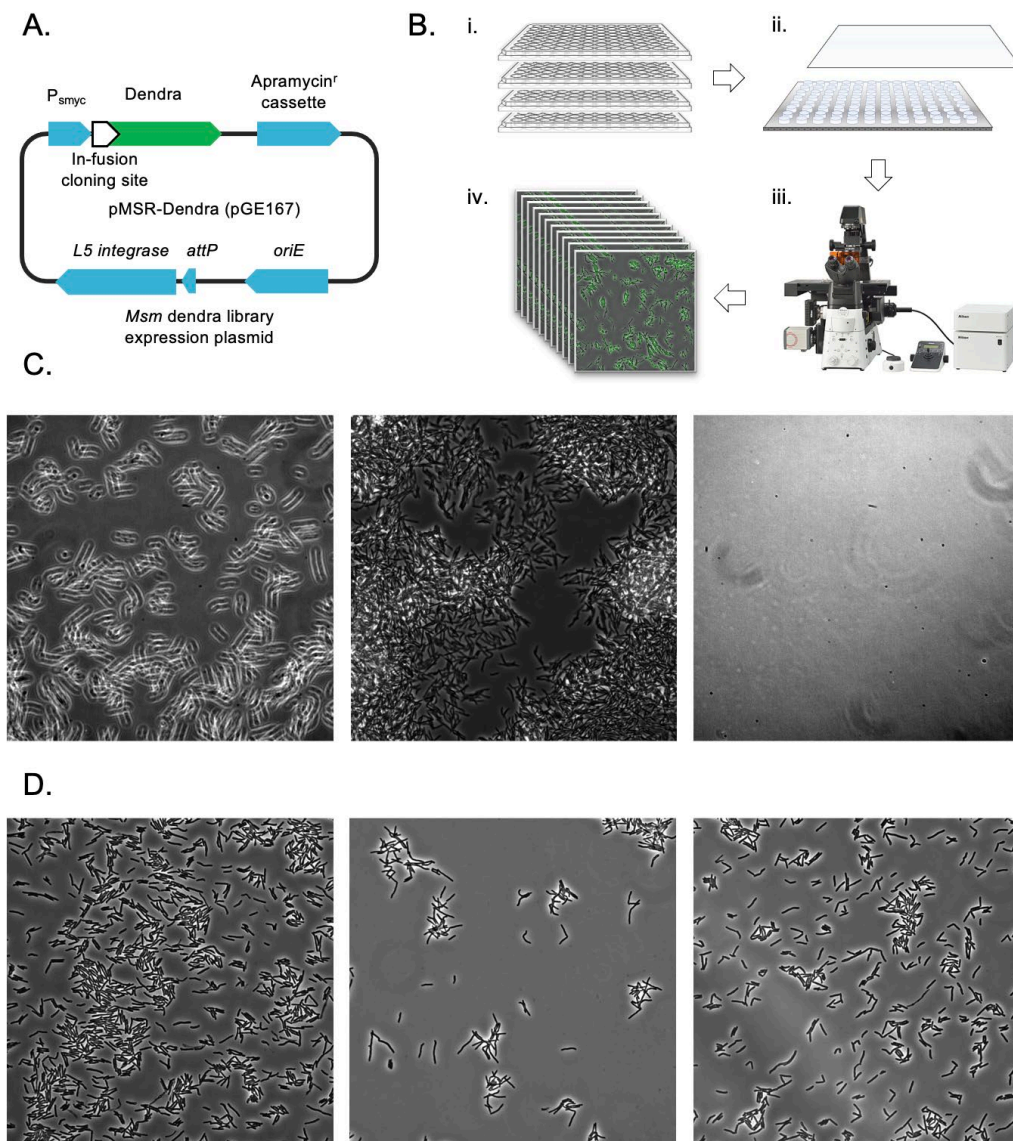

2 **Fig. S1. Overview of the MSR-Dendra library, related to Figure 1 and STAR Methods.**  
 3 A. Schematic of the pMSR-Dendra plasmid backbone. B. Overview of the image  
 4 acquisition method used to generate the MSR-Dendra dataset. After automated  
 5 acquisition, raw images are scored manually: off- focus images (C, left panel) or the ones  
 6 of extremely high or low cell density (C, middle and right panels) are rejected whereas  
 7 the qualified remnants (D) are subjected to image segmentation and other downstream  
 8 analysis.

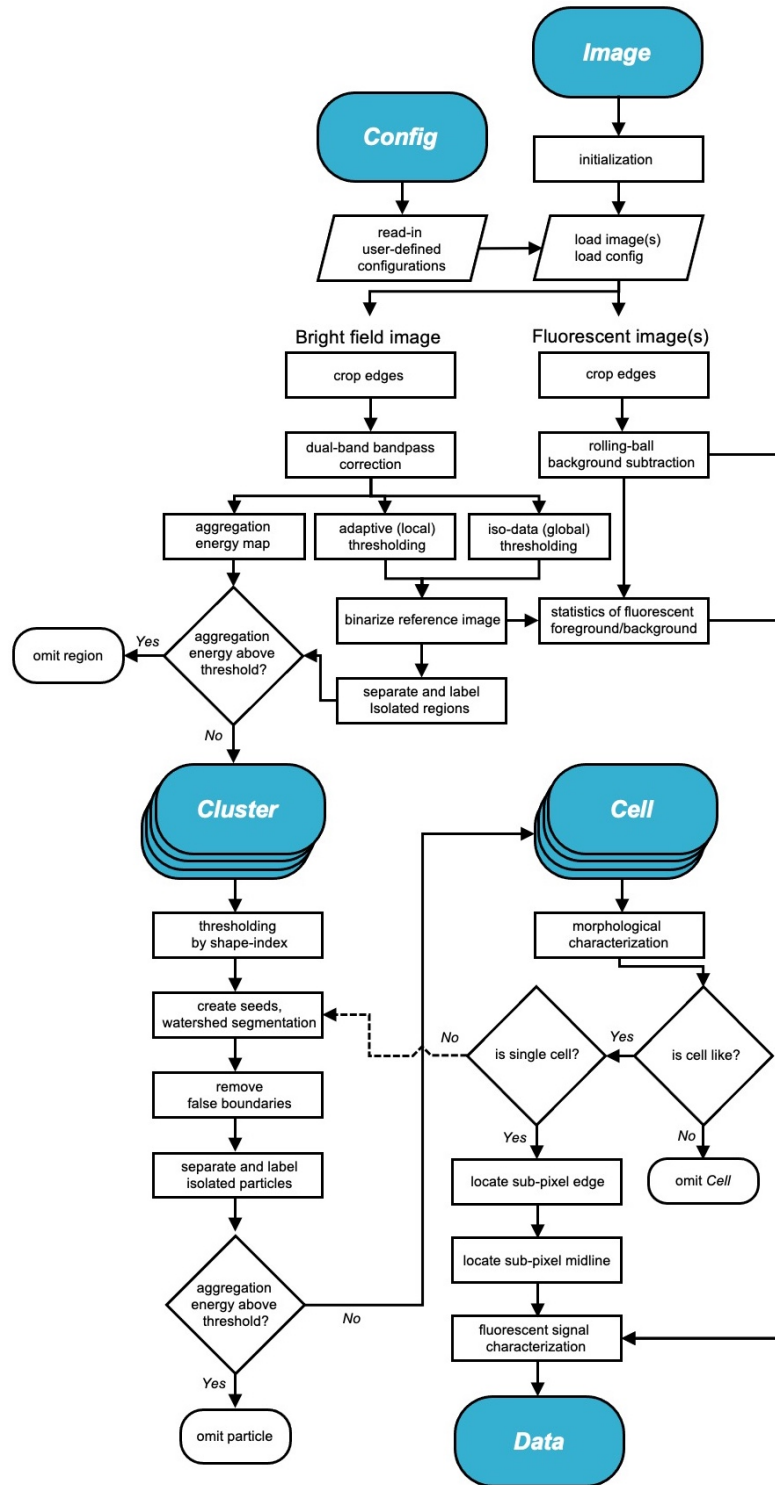

11 Fig. S2. Schematic of MOMIA pipeline structure, related to STAR Methods.

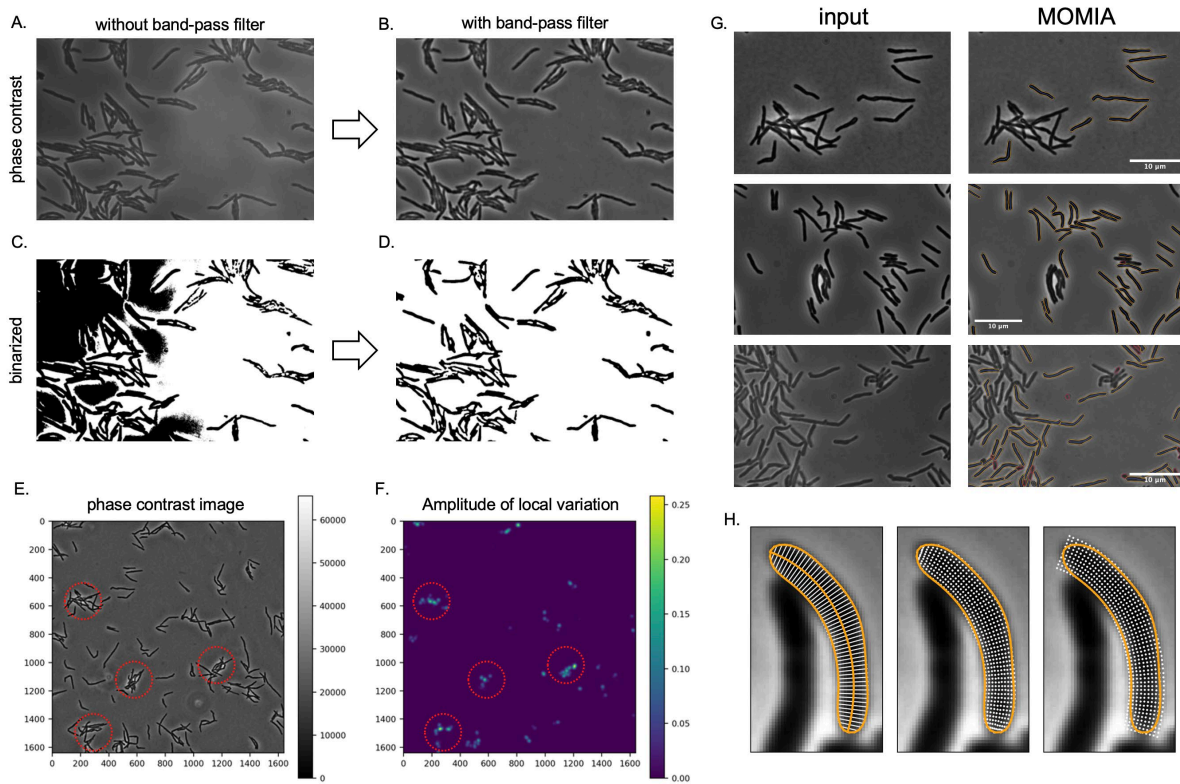

13 **Fig. S3. Image processing with MOMIA, related to STAR methods.** A-D. Dual-  
 14 bandpass filter enhances segmentation performance. A. Example phase contrast image  
 15 with uneven illumination. B. Dual-bandpass filtered output of A. C. Binarized mask of A.  
 16 using iso-data thresholding method, separation of image background (white) and cells  
 17 (black) is severely affected by uneven illumination. D. Binarized mask of B using the same  
 18 threshold method. E-F. Amplitude of local variation as an indicator for cellular aggregation.  
 19 E. Example phase contrast image with scattered cell aggregates. F. Computed amplitude  
 20 of local variation (STAR Methods). Regions with cell aggregates are circled in red. G.  
 21 Segmentation of different challenging imaging fields by MOMIA. Top row: recognition and  
 22 omission of cellular clumps; middle row: segmentation of cells in dense clusters; bottom  
 23 row: segmentation of cells in an image with aberrant illumination. Scale bars: 10  $\mu\text{m}$ .  
 24 Yellow lines: subpixel contours of segmented cells that are qualified for downstream  
 25 analysis. Red lines: contours of omitted objects. H. Subcellular signal profiling. Left: cell  
 26 contour and midline (orange) overlaid with orthogonal profile lines (white); middle:  
 27 width-adapted profile mesh (white dots); right: regular profile mesh (white dots).

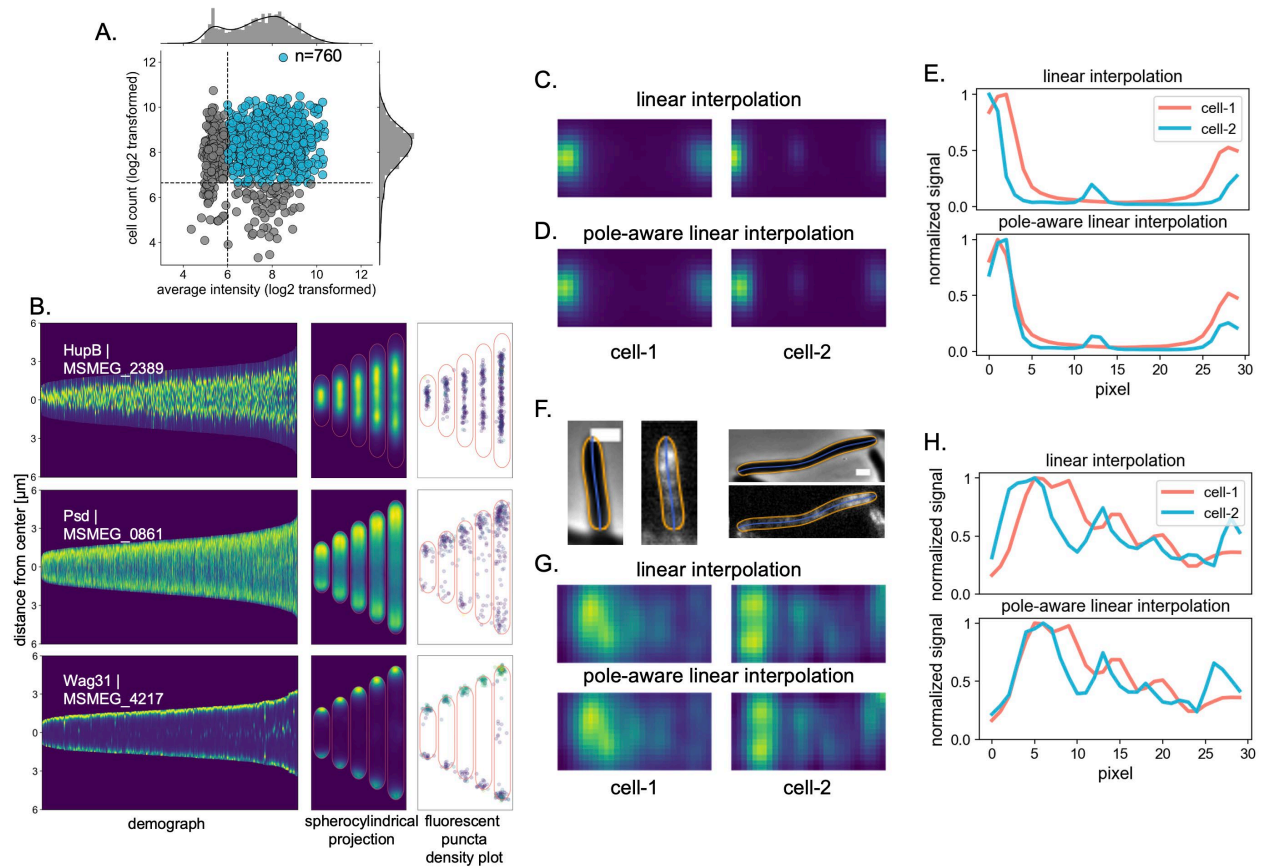

29 **Fig. S4. Post-segmentation processing of MSR-Dendra dataset, related to Figure 1**  
 30 **and STAR methods.** A. MSR-Dendra entries are scored by their corresponding cell  
 31 counts and averaged fluorescent intensities. The present study included 760 entries  
 32 which contain at least 150 cells and an average intensity over 64 (arbitrary cutoff). B.  
 33 Populational localization profiles of Dendra tagged HupB, Psd, and Wag31 (Top-bottom  
 34 panels) depicted as: left-fluorescent demograph; middle-Spherocylindrical projection; right-  
 35 foci density plot. C-E. Cell pole-aware, bimodal interpolation preserves polar topology. C.  
 36 Linear interpolation renders varied polar signal distributions of Wag31-Dendra,  
 37 exemplified by the two representative cells in Fig. 1H. D. Pole-aware, bimodal  
 38 interpolation enables consistent representation of the morphologically inert cell poles. E.  
 39 Interpolated data from C (upper panel) or D (bottom panel) are averaged along the  
 40 longitudinal axes and aligned to demonstrate the polar signal representation by the two  
 41 methods. F-H. Comparisons the two interpolation methods with example cells expressing  
 42 subpolar-associated Gtf1-Dendra (MSMEG\_0389). Scale bars: 1 μm.

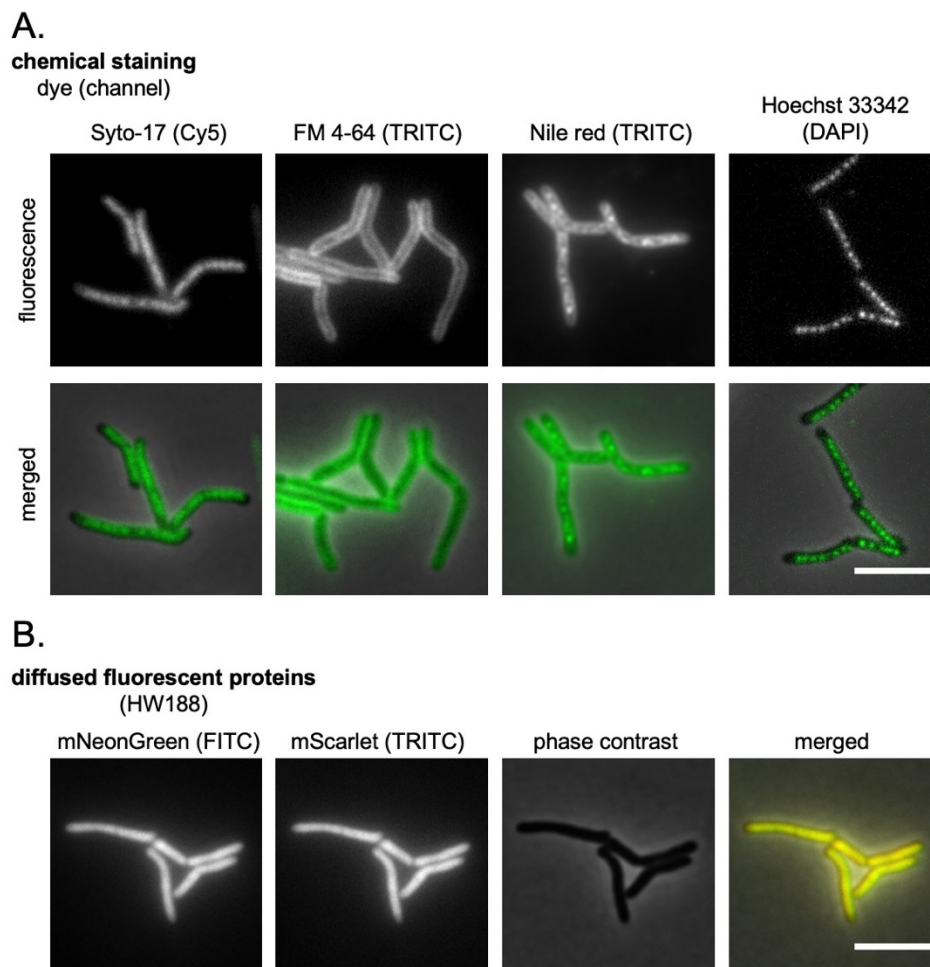

45 **Fig. S5. Independently generated validation dataset 1, related to Figure 3. A.**  
 46 Example images of chemical fluorescent dye stained *Msm*. B. Examples images of  
 47 untagged cytosolic fluorescent proteins mNeonGreen and mScarlet. Scale bars: 5  $\mu$ m.

48

49

50

51

A.

divisome components by  
Wu, J. K. et. al., 2018

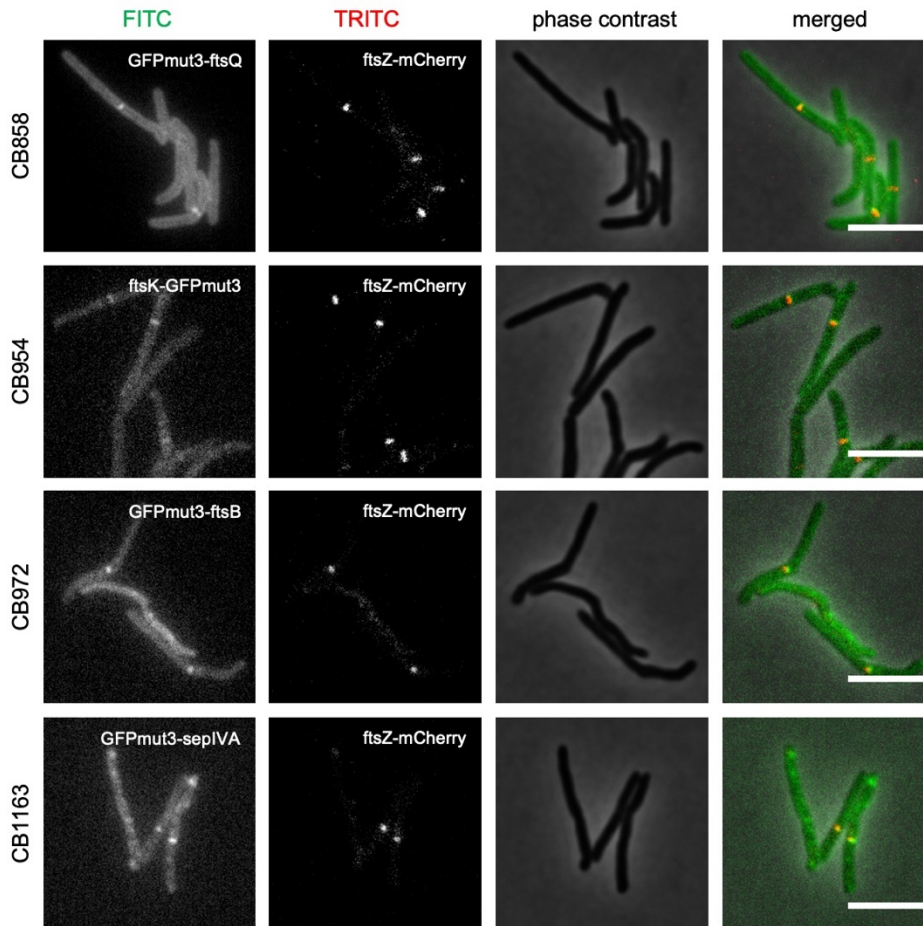

B.

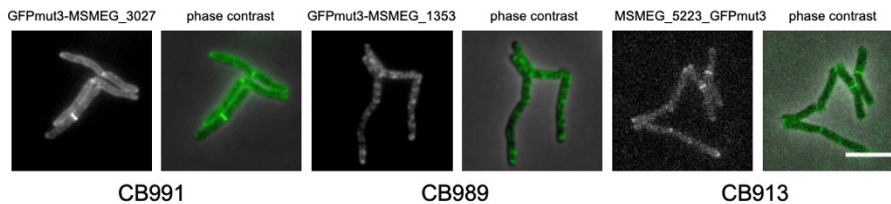

53 **Fig. S6. Independently generated validation dataset 2, related to Figure 3. A.**  
54 Example images of *Msm* expressing FtsZ-mCherry and one other mGFPmut3-tagged  
55 mycobacterial divisome components identified by Wu, J. K. et. al., 2018. B. Example  
56 images of *Msm* expressing postulated mycobacterial divisome components. Scale bars:  
57 5  $\mu$ m.

58

59

60

61

62

63

64

65

66

67

68

69

70

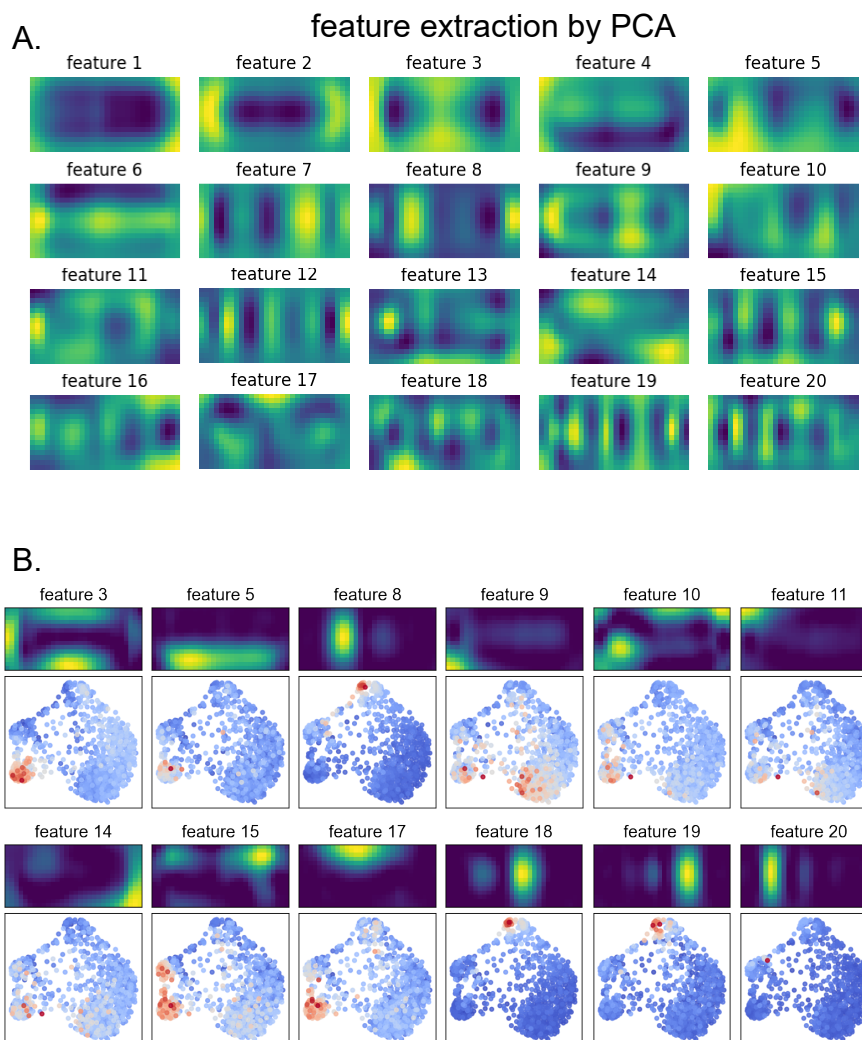

71 **Fig. S7. MSR-Dendra data matrix decomposition by PCA and NMF, related to**  
72 **Figures 2 and 3.** A. PCA decomposition infer holistic and complex features which are not  
73 visually intuitive. The matricized dataset in Fig. 3B is used to perform PCA decomposition  
74 ( $n=20$ ). The extracted features are rescaled and depicted with pseudocolors. B.  
75 Illustration of NMF derived localization patterns (continuation of Figures 3A and 3B).

76



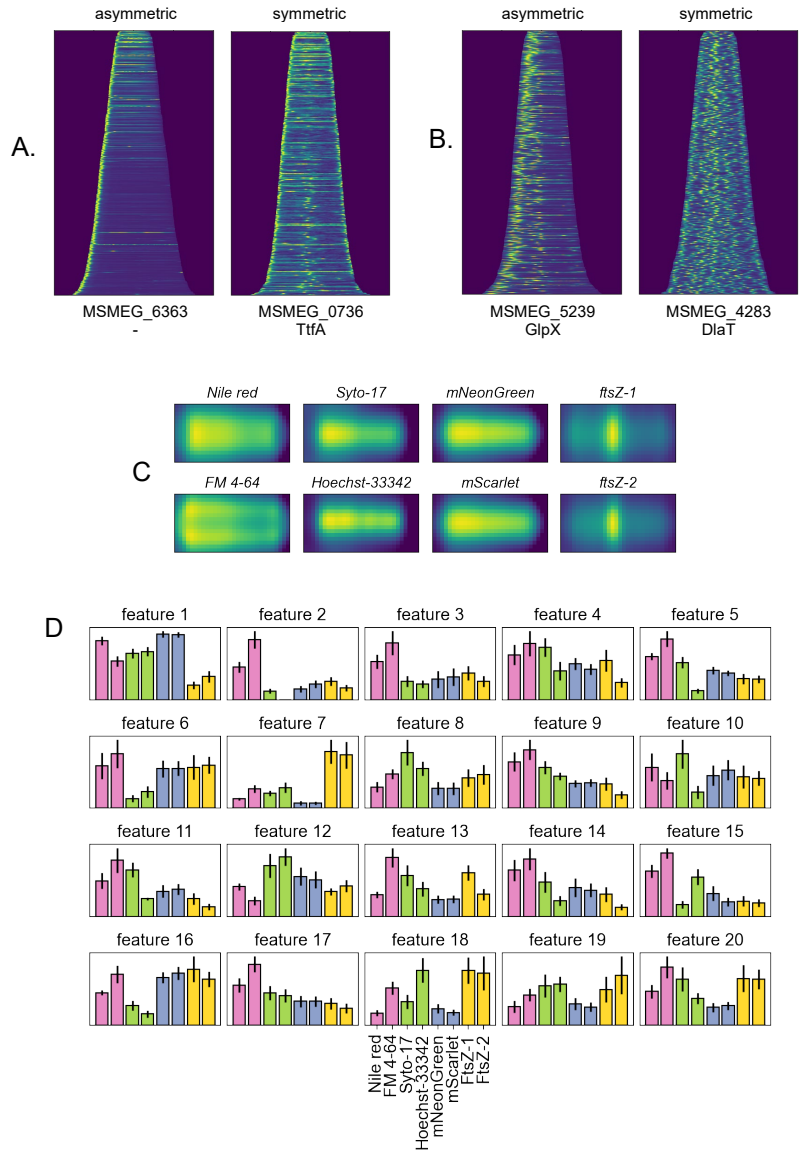

77

78 **Fig. S8. GEMATRIA extracted features faithfully characterize various protein**  
 79 **localization patterns, related to Figure 3. A and B.** Demographs of representative  
 80 strains discussed in Fig. 3C. C. Depiction of strain consensus of the 8 selected  
 81 validation datasets in Fig. 3D. Strain consensus is the average of the 10 frames of its  
 82 length-binned fluorescence patterns. D. Complete feature profiles of the selected  
 83 validation datasets. Error bars denote the standard deviation of corresponding feature  
 84 weights over the 10 length bins.

85

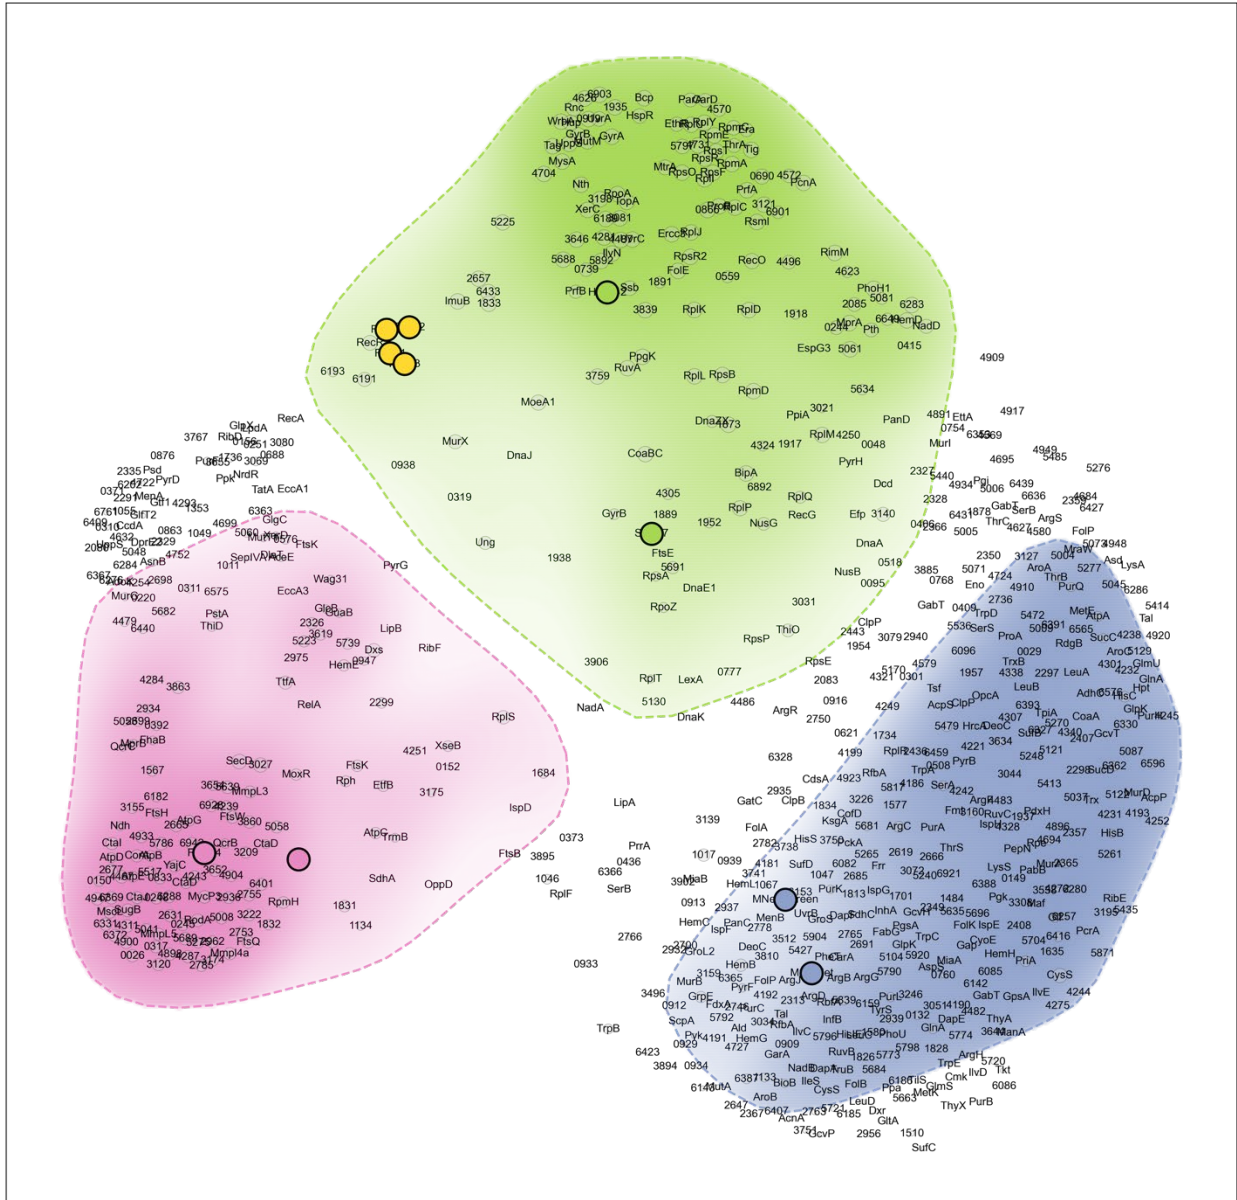

87 **Fig. S9. SAFE defines three major domains in the GEMATRIA derived composite**  
 88 **network (zoom-in view of Fig. 3E with labeled entry names or the abbreviated locus**  
 89 **identifiers), related to Figure 3.**

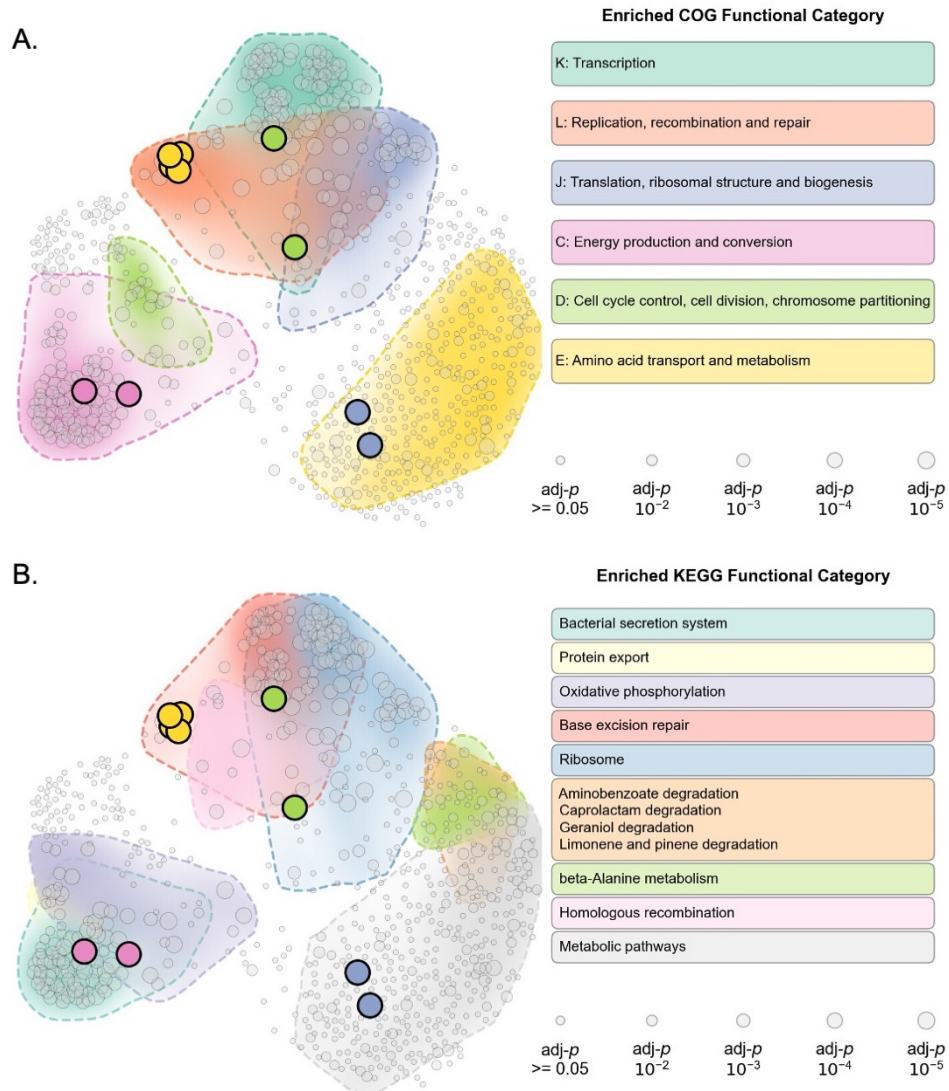

93 **Fig. S10. Subdomains of various biological functions are found in the GEMATRIA**  
 94 **derived composite network, related to Figure 3.** Subdomains are identified by SAFE  
 95 using a more stringent cutoff (<20% maximal distance) for merging overlapping network  
 96 neighborhoods. A. Subdomains enriched of individual COG categories as revealed by  
 97 SAFE. B. Subdomains enriched of KEGG (Kyoto Encyclopedia of Genes and Genomes)  
 98 terms. The sizes of the nodes denote the FDR-corrected  $p$  values by hypergeometric test,  
 99 as specified in the bottom right panels.

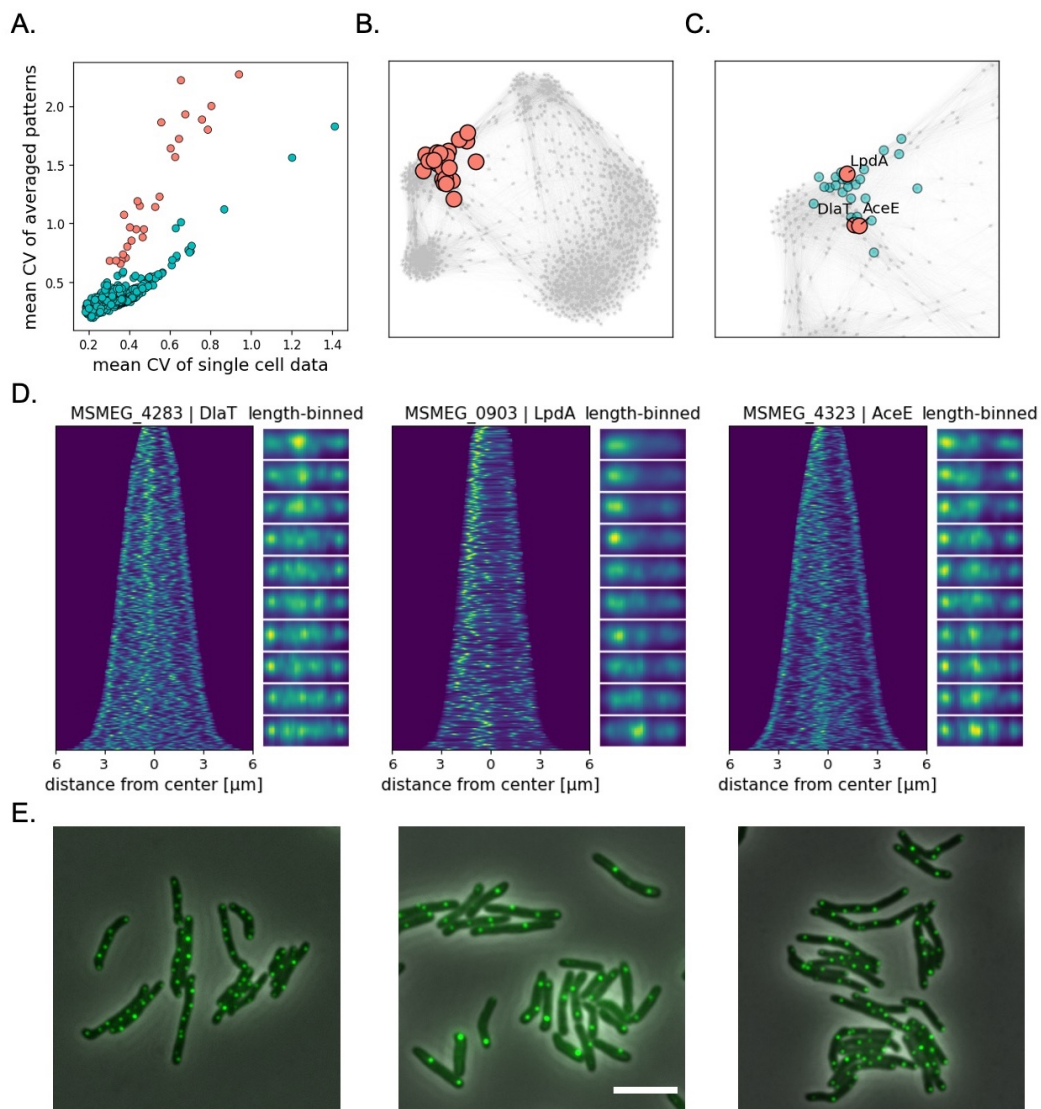

101 **Fig. S11. Outliers with underrepresented signal variation are clustered together,**  
 102 **related to Table S2.** A. The comparison of mean signal coefficient of variation (CV)  
 103 before (horizontal- axis) and after interpolation and data binning (vertical-axis). CV  
 104 outliers are highlighted in red. B. Network locations of CV outliers. C. Zoom-in view of the  
 105 outlier-enriched region. The three subunits of mycobacterial pyruvate dehydrogenase  
 106 (AceE, DltA, LpdA) are colored red wherein other CV outliers are colored blue. D.  
 107 Fluorescent demographs (left panels) and length-binned patterns (right panels) of the  
 108 pyruvate dehydrogenase subunits. E. Example microscopy images of the three pyruvate  
 109 dehydrogenase subunits (DltA, LpdA, and AceE). Scale bar: 5 μm.

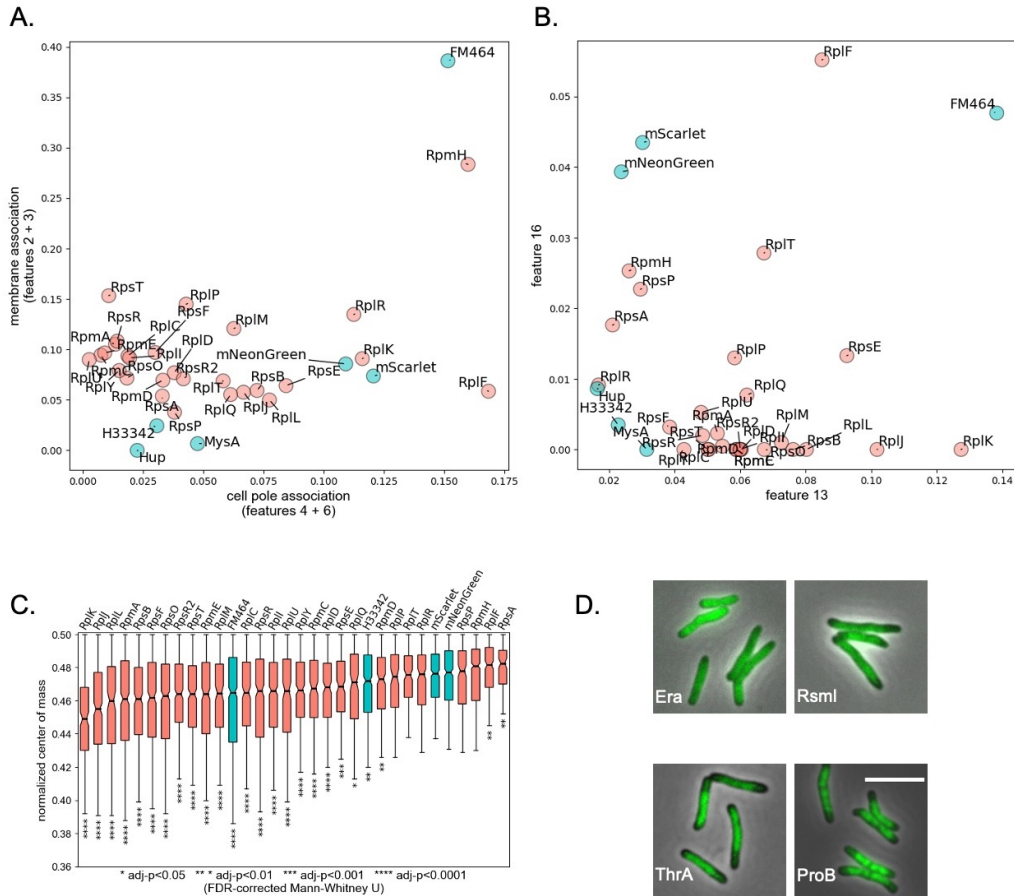

111 **Fig. S12. Ribosomal proteins are asymmetrically distributed in mycobacteria cells,**  
 112 **related to Figure 4.** A. Ribosomal proteins exhibit cytosolic signals with diminished  
 113 prevalence at the cell poles. The scatter plot denotes the summed means of the  
 114 corresponding features for 29 ribosomal proteins (light red) and 6 non-ribosomal entries  
 115 (light blue). B. Disproportional peripolar prevalence of mycobacterial ribosomal proteins  
 116 as revealed by features 13 and 16. C. Mycobacterial ribosomal proteins exhibit  
 117 significantly lower longitudinal symmetry compared to diffused cytosolic proteins.  
 118 Normalized center-of-mass (NCM) is calculated as specified in STAR Methods and is  
 119 used to evaluate the symmetry of longitudinal signals. Mann-Whitney U test is used to  
 120 compare the NCM profiles of each entry to that of the cytosolic entry, mNeonGreen.  
 121 Multiple testing is corrected using the Benjamini-Hochberg method. The symbolic  
 122 representations of adjusted-p values are listed beneath the boxplot. D. Example images  
 123 of MSR-Dendra entries that closely associate with the ribosome cluster. Scale bar: 5  $\mu$ m.

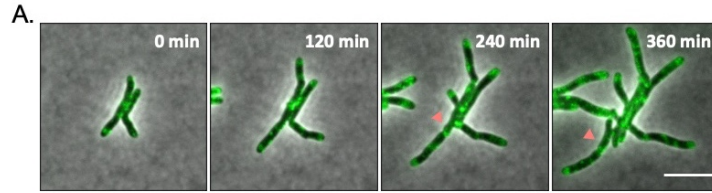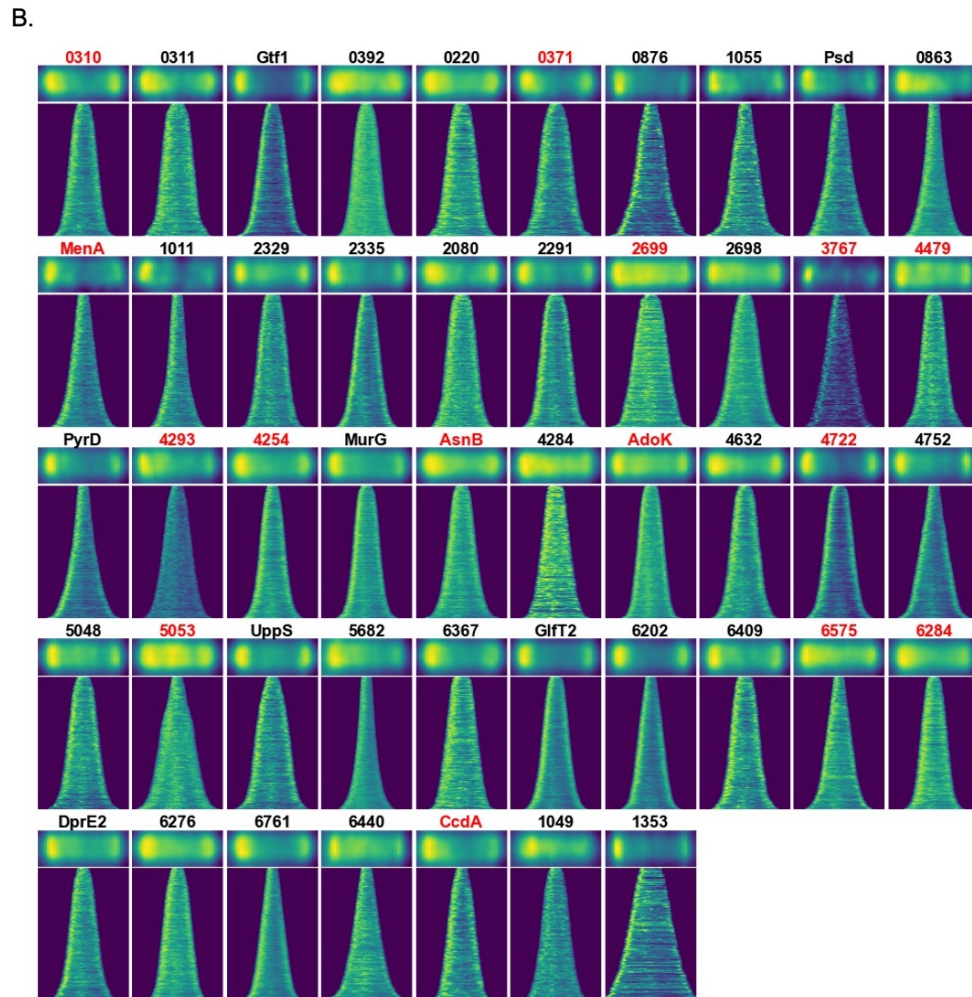

125 **Fig. S13: GEMATRIA unveils subdomains enriched for known and novel IMD**  
 126 **proteins, related to Figure 5.** A. Representative frames of MSMEG\_4479 time-lapse  
 127 data (Video S3). Scale bar: 5  $\mu$ m. B. In total 47 IMD-like entries are found using a SAFE  
 128 based analysis and the biochemically characterized IMD proteins (Hayashi et al., 2016)  
 129 as the reference. Protein localization patterns are demonstrated by the strain  
 130 consensus (top panels) and the *demographs* (bottom panels). Protein names or  
 131 abbreviated locus identifiers of novel IMD proteins are colored in red.

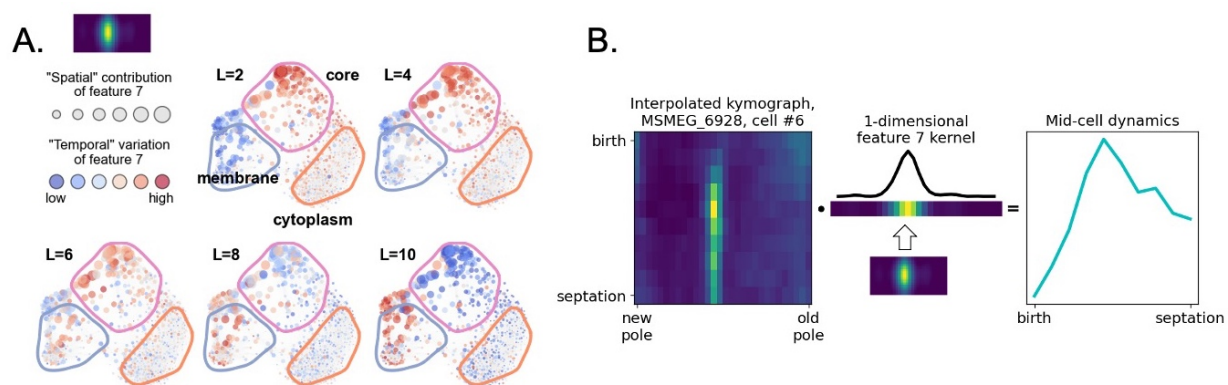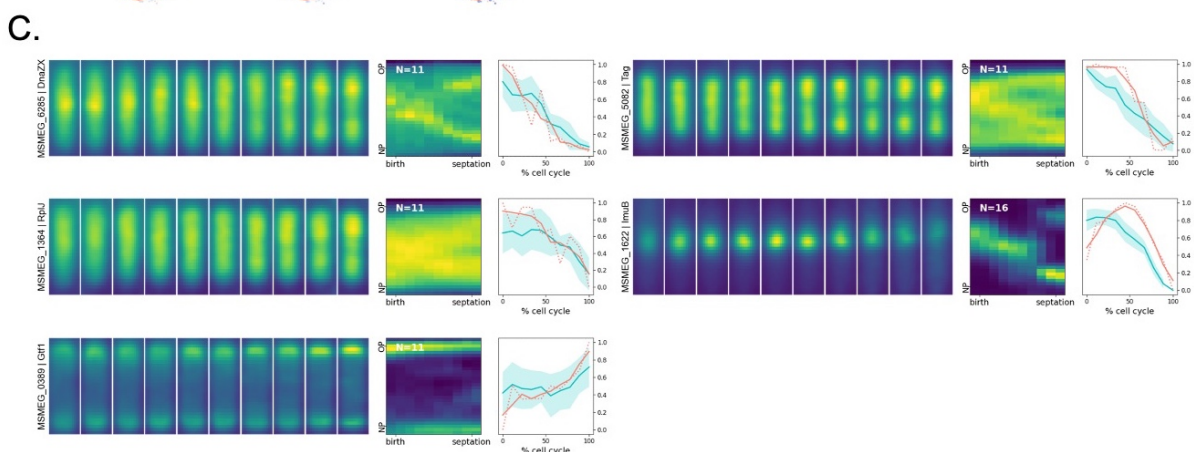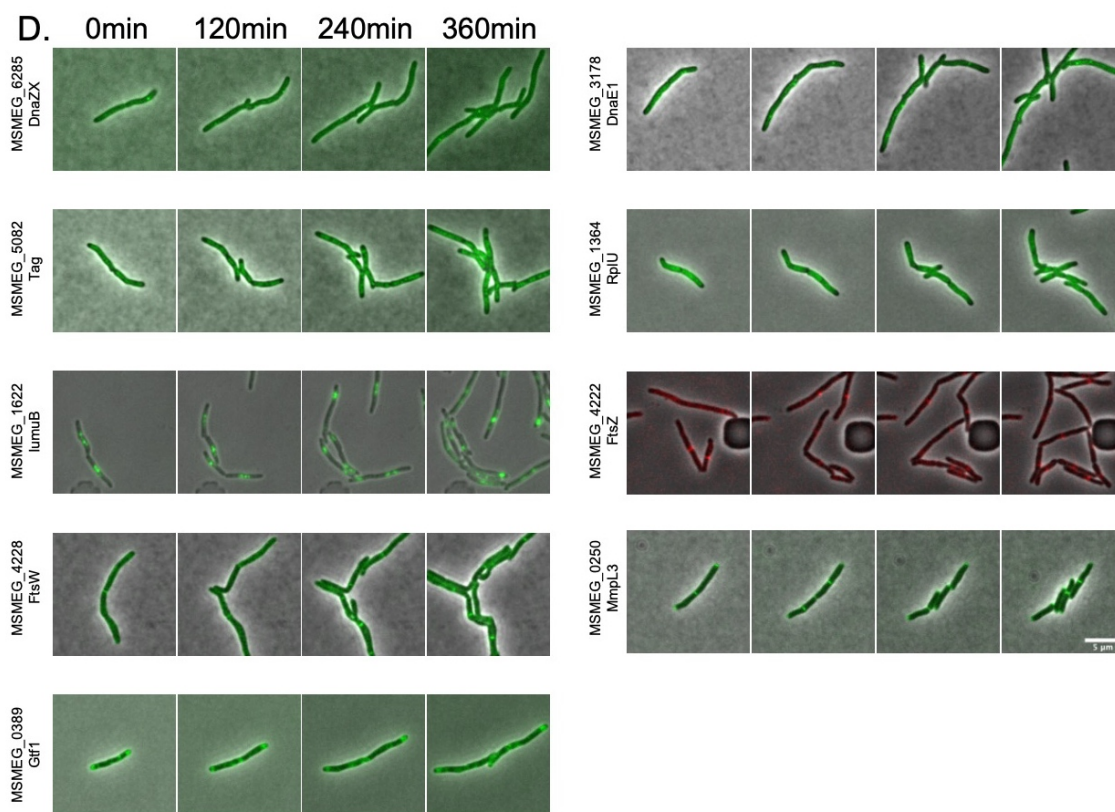

133 **Fig. S14: Approximation of cell-cycle-dependent mid-cell dynamics using**  
134 **GEMATRIA derived feature 7, related to Figure 6.** A. Mid-cell associated feature 7  
135 displays coordinated reallocation from the *core* domain to the *membrane* domain on a  
136 global scale. Here five sliced views (L=2, 4, 6, 8, and 10) of feature 7 dynamics are  
137 demonstrated, the full-length representations are animated in the Video S4. Node sizes  
138 represent the average feature 7 weights of MSR-Dendra entries, which remain constant  
139 over “time”. The color-warmth (blue to red) of each node defines the normalized feature  
140 7 intensity as a function of cell length, or “time”. B. Schematic of extracting mid-cell  
141 dynamics from time- lapse kymographs using feature-7 *basis* matrix as a prior. Axial  
142 signal profiles of a single cell were oriented from time of birth to time of division and from  
143 new pole to old pole, normalized, then interpolated into a  $10 \times 30$  matrix. A 1-dimensional  
144 feature-7 kernel ( $1 \times 30$ ) was derived by calculating the lateral mean of the feature-7 *basis*  
145 matrix. Mid-cell dynamics is represented by the dot product of the interpolated kymograph  
146 and the 1-dimensional feature-7 kernel. C. Length- binned patterns, fluorescence  
147 kymographs and mid-cell dynamics of test subjects (Fig. 6E) that were not listed in Fig.  
148 6A. D. Representative time-lapse image slices of proteins presented in Fig. 6E.  
149 Fluorescence signals for Dendra-tagged proteins were pseudo-colored green where as  
150 mCherry-tagged FtsZ (reference strain CB954) signals were pseudo-colored red. Scale  
151 bar: 5  $\mu\text{m}$ .

152

153

154

155

156

157

158

159

160

161

162



163

164

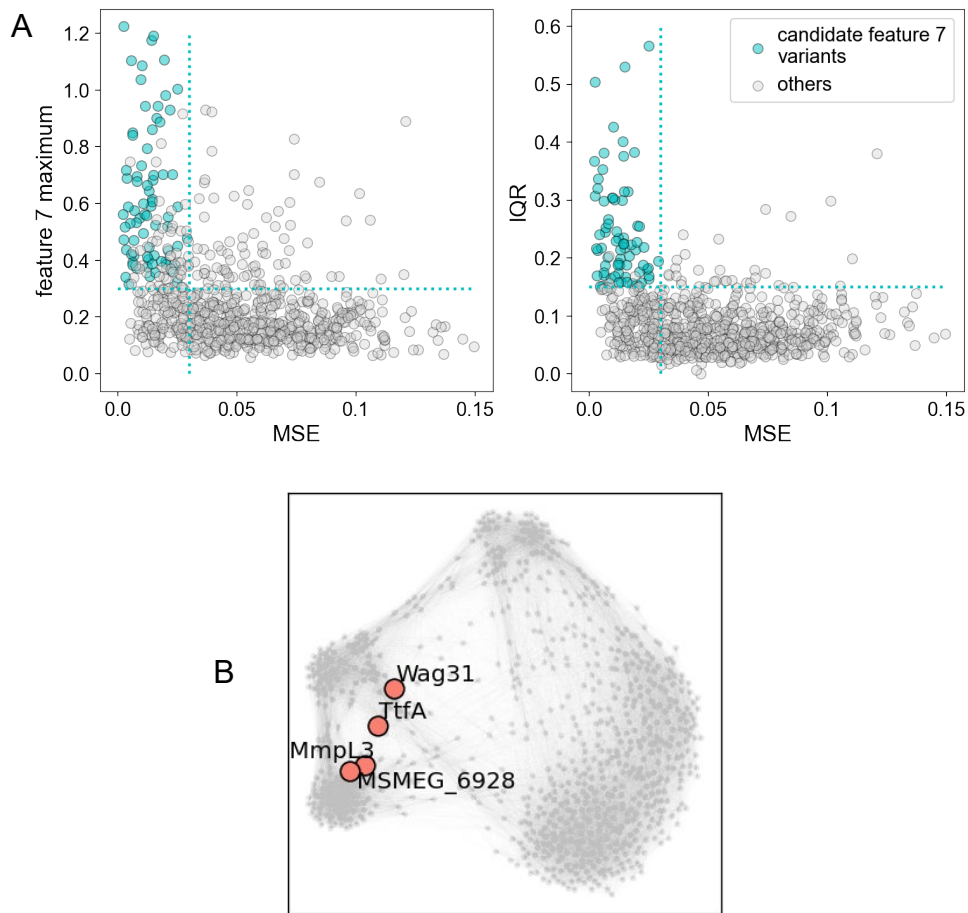

165

166 **Fig. S15: Identification and case analysis of feature 7 variants, related to Figure 6**  
167 **and STAR methods.** A. Criteria defining candidate cell-cycle-dependent feature 7  
168 variants. The maximum, the IQR, and the mean squared errors (MSE) of feature 7 profiles  
169 are calculated as specified in STAR Methods. Dashed lines denote the arbitrary cutoffs  
170 that separate candidate feature 7 variants from the remnants. B. MSMEG\_6928 and the  
171 mycolic-acid transporter MmpL3 co-localize on the composite network.

172

173

174
